# Supplementary material for: Fever Is Mediated by Conversion of Endocannabinoid 2-Arachidonoylglycerol to Prostaglandin E2
Source: PubMed Central journal article supplement (PMC4511515; doi:10.1371/journal.pone.0133663), 2015-07-21
Supplement: pone.0133663.s001.pdf [file pone.0133663.s001.pdf]

S1 Fig.

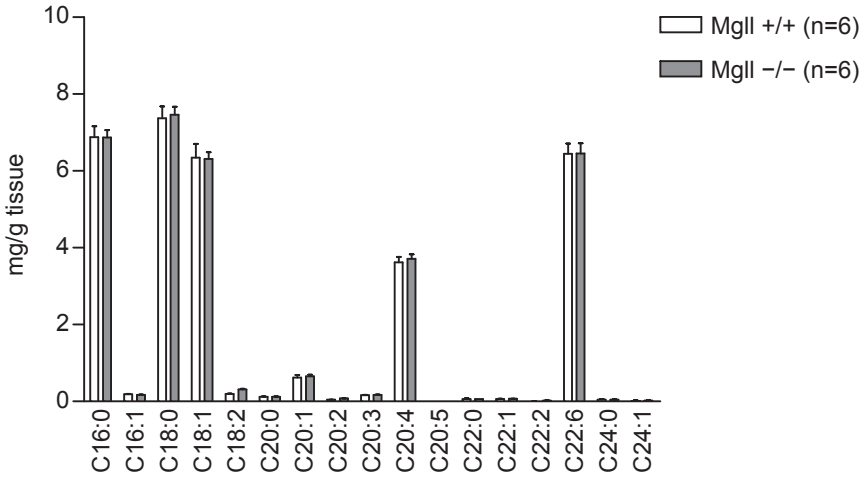

No statistically-significant difference found between WT and KO (Bonferroni post-test after two-way ANOVA)  
Data are expressed as mean ± s.d.
