# Supplementary material for: Fever Is Mediated by Conversion of Endocannabinoid 2-Arachidonoylglycerol to Prostaglandin E2
Source: PubMed Central journal article supplement (PMC4511515; doi:10.1371/journal.pone.0133663), 2015-07-21
Supplement: pone.0133663.s004.pdf [file pone.0133663.s004.pdf]

# S4 Fig.

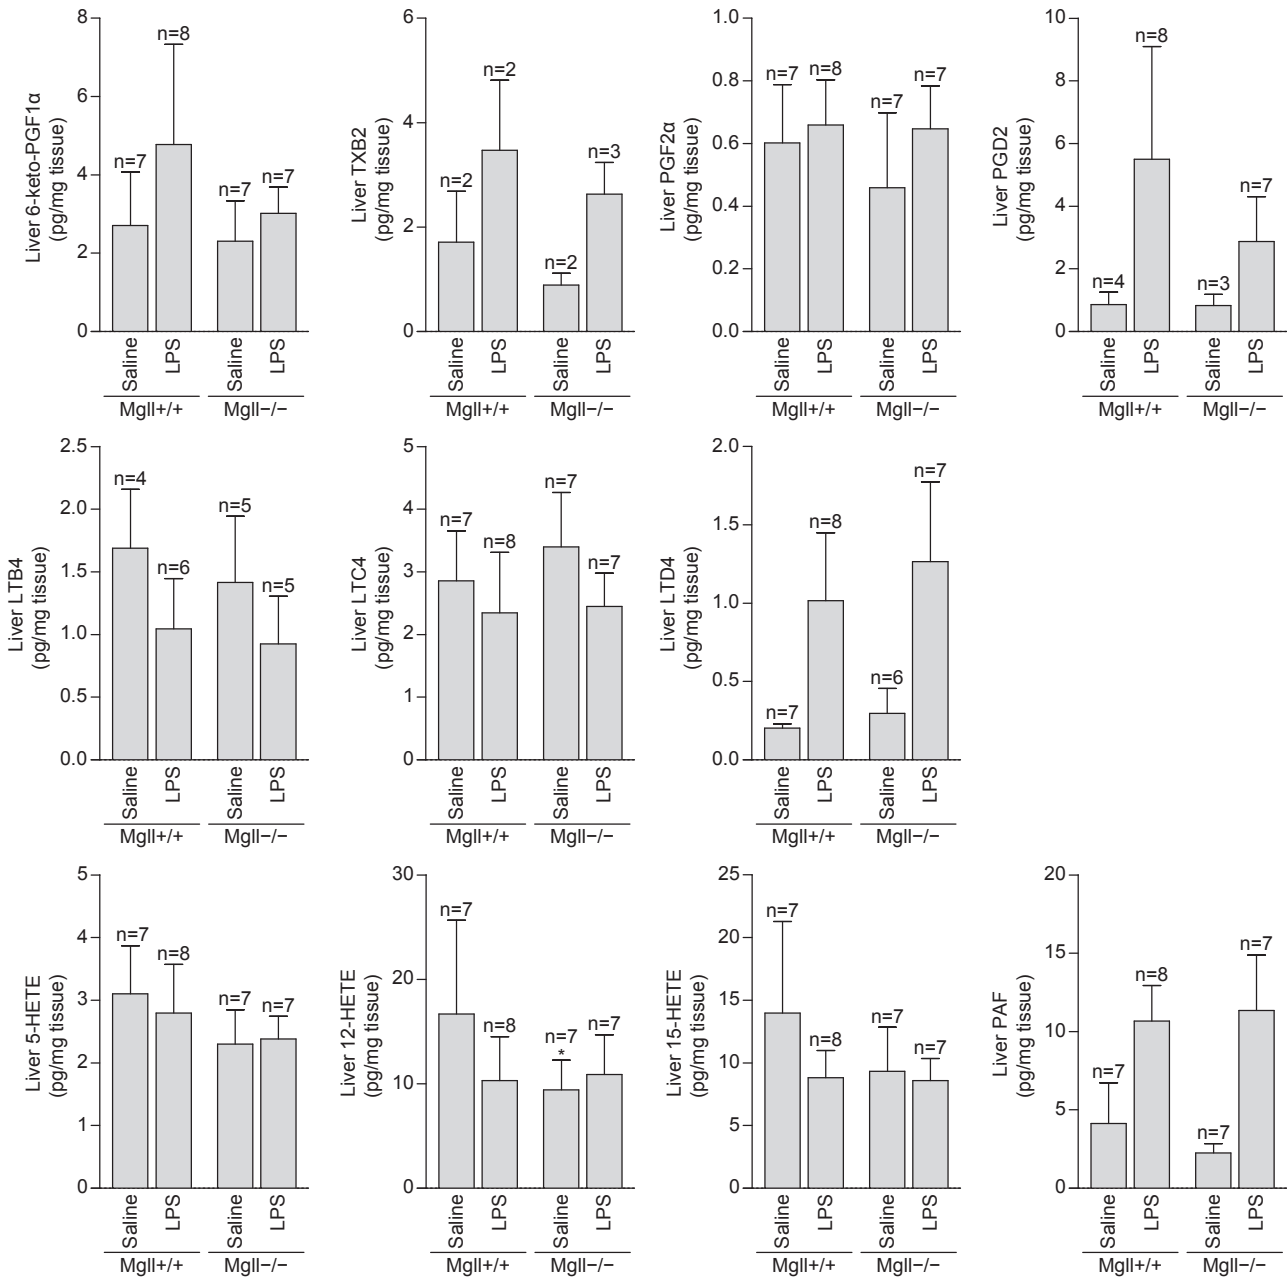

\* $p < 0.05$ , vs. MgII<sup>+/+</sup> (Bonferroni post-test after two-way ANOVA)

Data are expressed as mean  $\pm$  s.d.
